# Supplementary material for: Toll-like Receptor-4 Activation Boosts the Immunosuppressive Properties of Tumor Cells-derived Exosomes
Source: PubMed Central journal article supplement (PMC6560033; doi:10.1038/s41598-019-44949-y), 2019-06-11
Supplement: 41598_2019_44949_MOESM1_ESM.pdf [file 41598_2019_44949_MOESM1_ESM.pdf]

**Toll-like Receptor-4 Activation Boosts the Immunosuppressive Properties of Tumor Cells-derived Exosomes**

Rossana Domenis, Adriana Cifù, Daniele Marinò, Martina Fabris, Kayvan R. Niazi, Patrick Soon-Shiong, Francesco Curcio

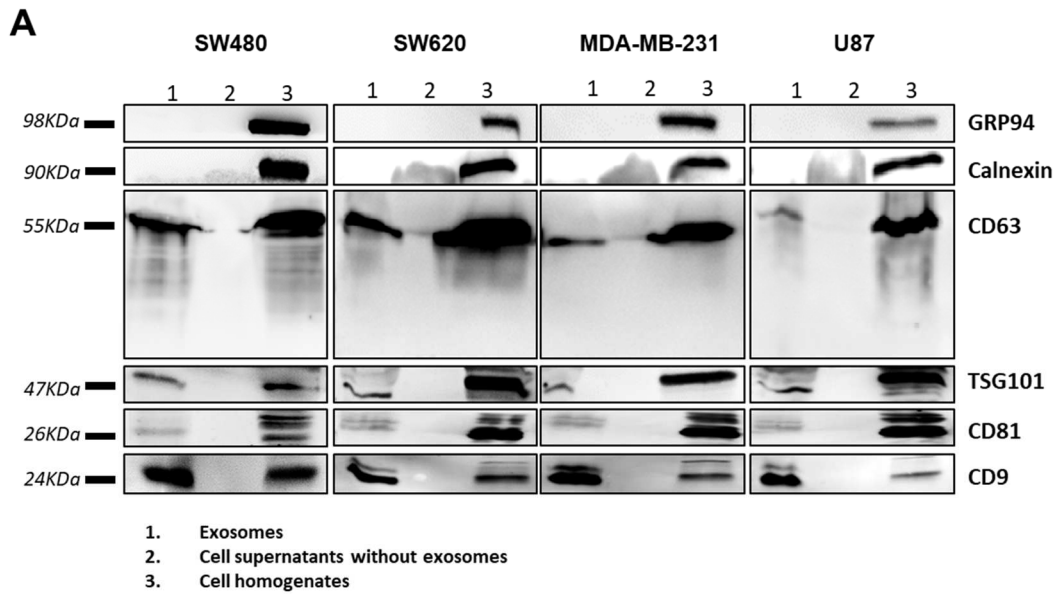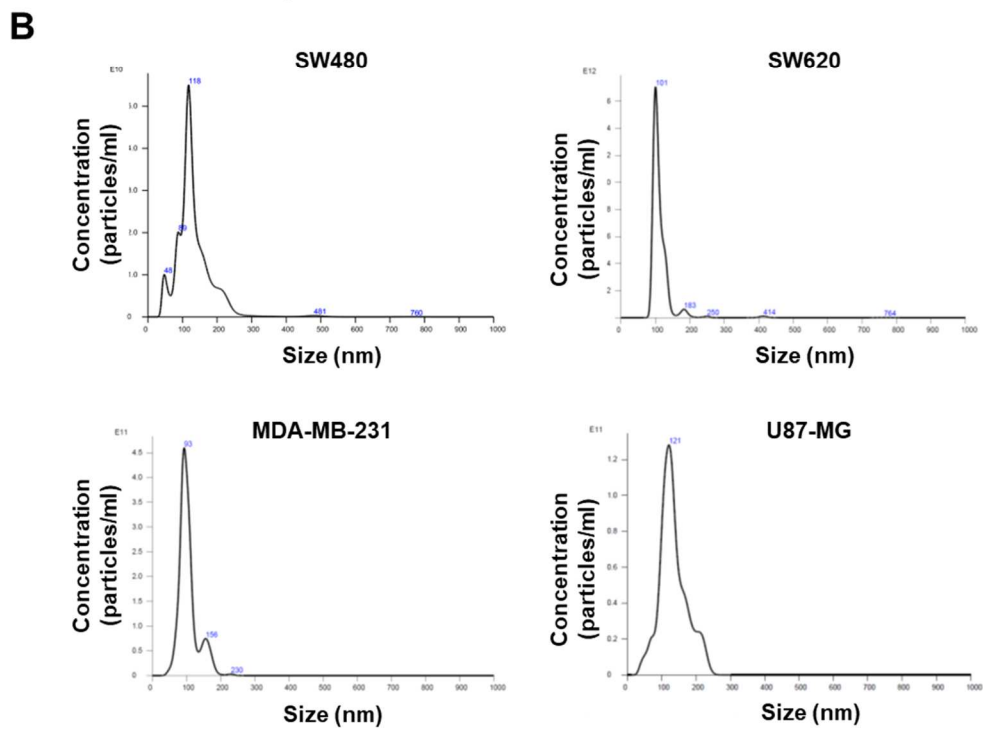

**Supplementary Figure 1. Immunoblotting and particles size analysis of tumor-cells derived exosomes**

(A) Immunoblotting analysis of exosomes, Exoquick-derived supernatants and cells homogenates probed for the indicated proteins. (B) Representative NTA graphs of frequency size distribution of particles.
